# Supplementary material for: Fluorescein-based fluorescent porous aromatic framework for Fe3+ detection with high sensitivity
Source: Royal Society of Chemistry journal article supplement (doi:10.1039/c8tc06288a), 2019-01-01
Supplement: c8tc06288a1.pdf [file c8tc06288a1.pdf]

## Supporting Information

### **Fluorescein-based fluorescent porous aromatic framework for Fe<sup>3+</sup> detection with high sensitivity**

#### **Table of Contents**

|                                        |        |
|----------------------------------------|--------|
| S.1 Experimental Section .....         | Page 2 |
| Synthesis of PAF-1.....                | Page 2 |
| Synthesis of PAF-NO <sub>2</sub> ..... | Page 2 |
| Synthesis of PAF-NH <sub>2</sub> ..... | Page 2 |
| Synthesis of PAF-5CF.....              | Page 2 |
| Figure S1:Characterizations .....      | Page 3 |
| Table S1.....                          | Page 3 |
| Figure S3.....                         | Page 4 |
| S.2 Luminescent measurements.....      | Page 4 |
| Figure S3-Figure S4.....               | Page 4 |
| Figure S5.....                         | Page 5 |
| S.3 Reference.....                     | Page 6 |

## S.1 Experimental Section

### Synthesis of PAF-1

PAF-1 was synthesized according to the previously reported synthesis method.<sup>1</sup> Tetrakis(4-bromo-phenyl)methane is used as the tetrahedral building block and its benzene rings are connected by the Ullmann cross-coupling reaction catalyzed by nickel (0). PAF-1 was obtained as an off-white powder.

### Synthesis of PAF-NO<sub>2</sub>

PAF-1 (100 mg) was suspended in acetic anhydride (50 mL), and put the reaction vessel in ice water, then the reaction was carried out at room temperature for 2 days after dropwisely adding concentrated nitric acid. The mixture was filtered and washed with plenty of water to give solid of PAF-1-NO<sub>2</sub>. Dried to get light yellow solid at 70 °C.

### Synthesis of PAF-NH<sub>2</sub>

Dried 100 mg of PAF-1-NO<sub>2</sub> and 3.26 g of SnCl<sub>2</sub>·2H<sub>2</sub>O were suspended in 20 mL of ethanol and heated at 70 °C for 8 h. The solids were centrifuged and suspended in 20 ml concentrated hydrochloric acid for 30 minutes. And then the solids were filtered and washed with water and ethanol with three times respectively to give yellow PAF-1-NH<sub>2</sub>.

### Synthesis of PAF-5CF

The mixture of 50 mg PAF-1-NH<sub>2</sub>, 80 mg 5-carboxyfluorescein, 0.23 g 1-(3-Dimethylaminopropyl)-3-ethylcarbodiimide hydrochloride (EDCI) and 0.16g Nhydroxybenzotrizole (HOBT) was dissolved in 24 mL of dry DMF. Then 0.9 mL of triethylamine was added to the flask and the mixture was reacted at room temperature for 48 h under nitrogen atmosphere. The product were filtered and washed with DMF, ethanol, CH<sub>2</sub>Cl<sub>2</sub>, respectively. PAF-5CF was obtained as a light orange solid powder after drying under vacuum.

## Characterizations

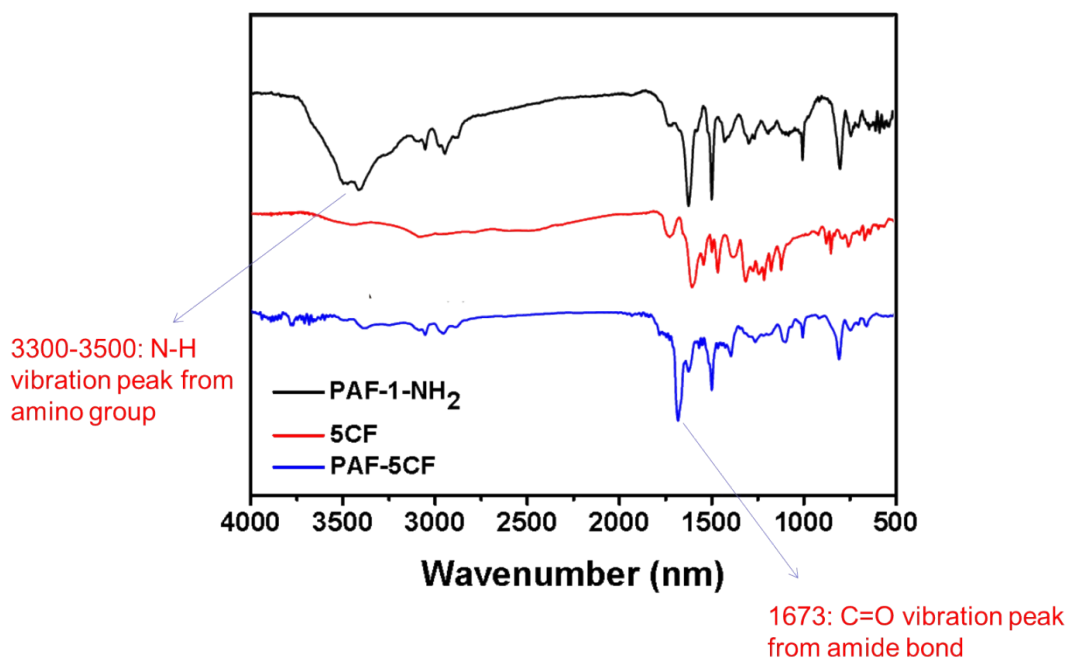

Fig. S1. FT-IR spectra of PAF-1-NH<sub>2</sub>, 5-carboxyfluorescein and PAF-5CF.

Table S1. Peak assignment for the FT-IR spectra of PAF-1-NH<sub>2</sub>.

| Peak (cm <sup>-1</sup> ) | Assignment and notes                                                |
|--------------------------|---------------------------------------------------------------------|
| 3300-3500                | N-H vibration peak from amino group                                 |
| 3410                     | O-H stretching from water                                           |
| 3037                     | Aromatic C-H stretching from phenyl rings.                          |
| 2980, 2940               | Aliphatic C-H stretching from CH <sub>3</sub> and CH <sub>2</sub> . |
| 1673                     | C=O vibration peak from amide bond                                  |
| 1607                     | Aromatic ring C=C stretching                                        |

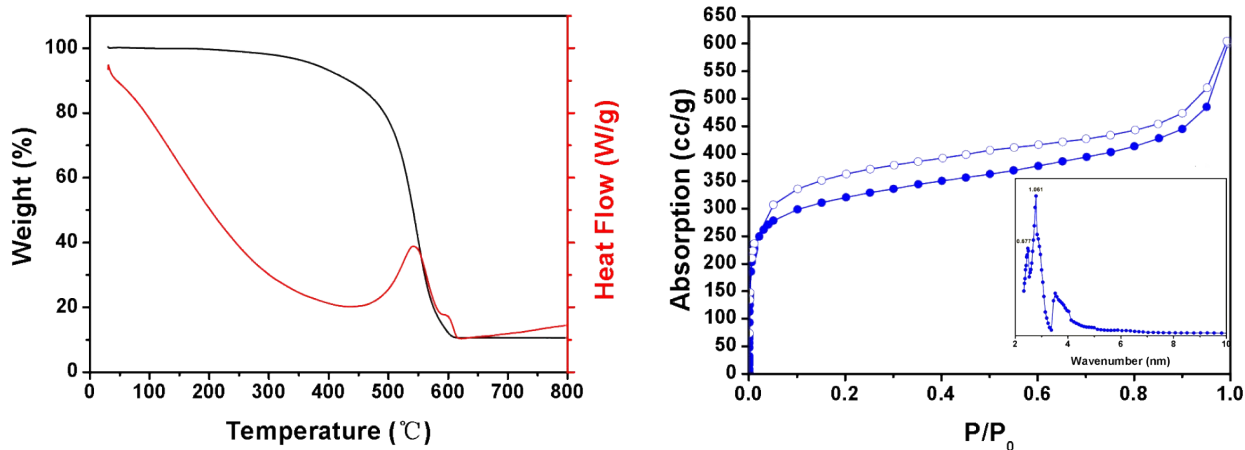

Fig. S2 (a) TGA and DSC curves of PAF-5CF. (b) N<sub>2</sub> adsorption isotherm of PAF-5CF at 77 K and its pore size distribution.

## S.2 Luminescent measurements

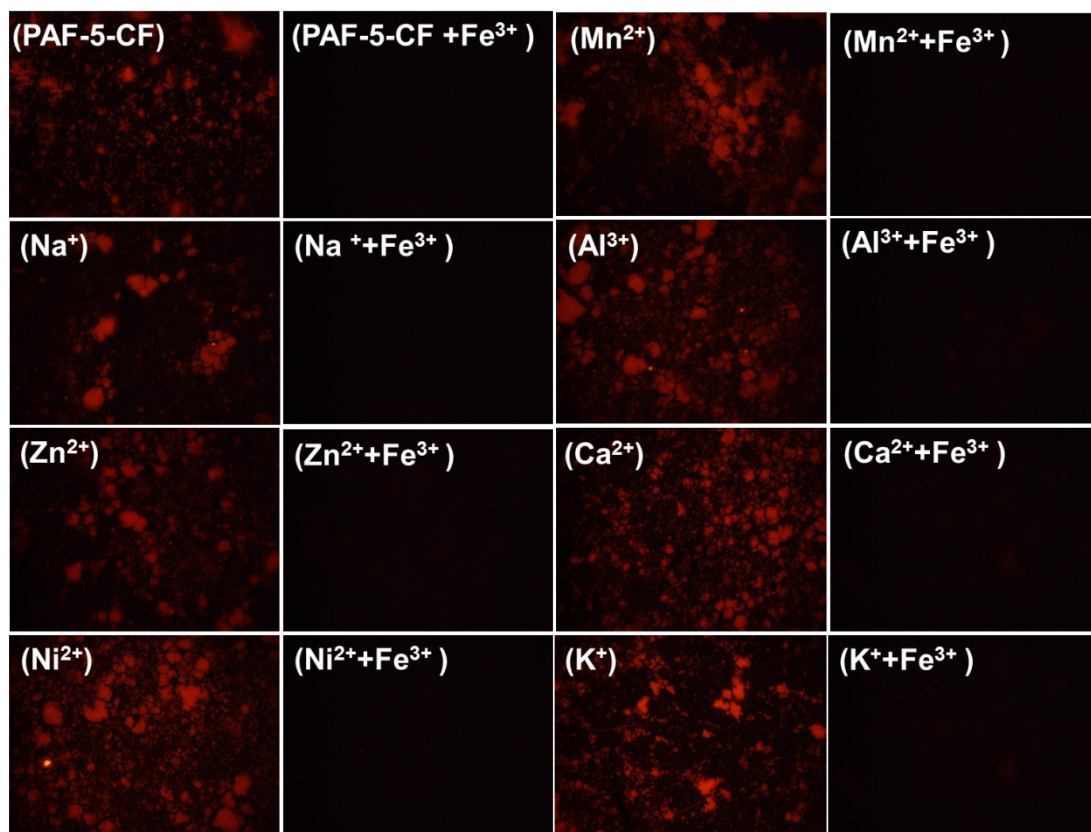

Fig. S3 Solid-state fluorescent photographs of PAF5-CF using a laser scanning confocal microscope.

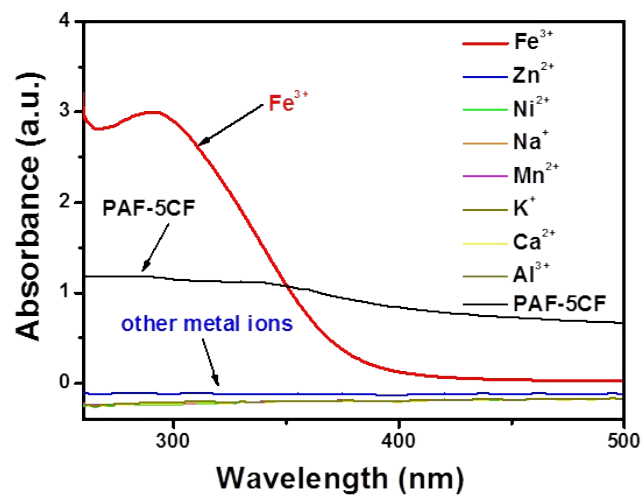

Fig. S4 Absorption spectra of metal ion solutions (1 mmol·L<sup>-1</sup>) and PAF-5CF/ethanol suspension (0.5 mg/10 mL).

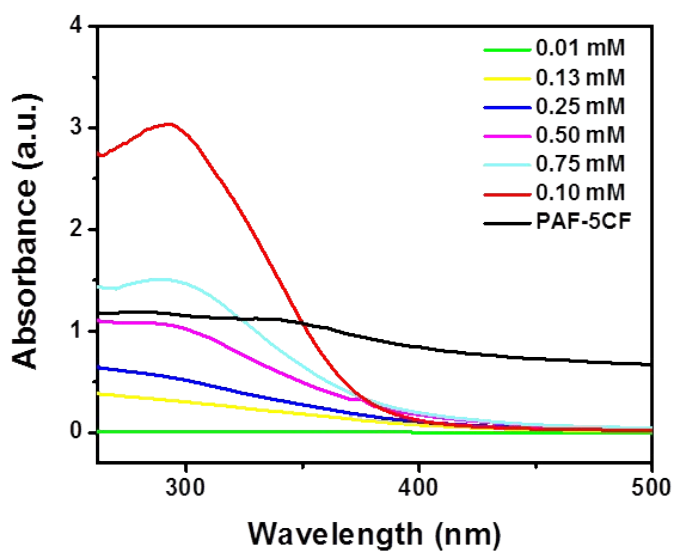

Fig. S5 Absorption spectra of PAF-5CF response to Fe<sup>3+</sup> of different concentrations

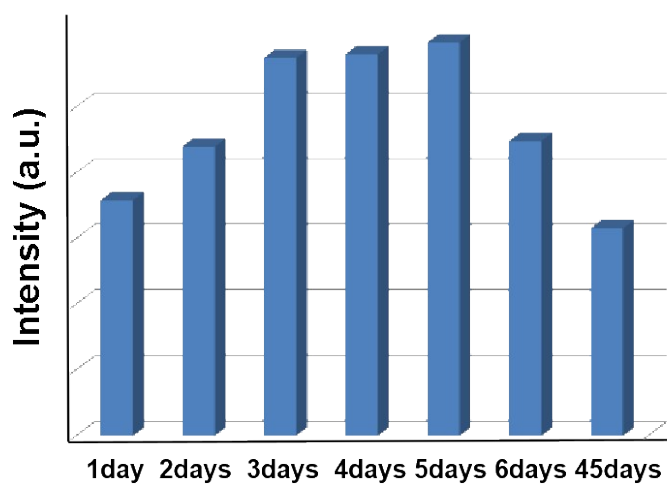

Fig. S6 The fluorescent intensity of PAF-5CF over different times.

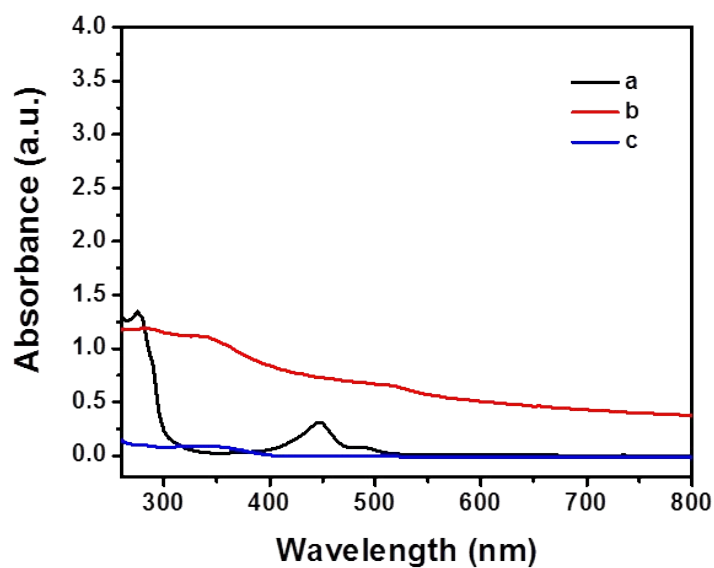

Fig. S7 Absorption spectra of the leaking test: (a) 5-CF solution; (b) PAF-5F suspension; (c) the filtrate of PAF-5F/ethanol suspension after stirring and washing for 24 h.

### S.3 Reference

- 1 T. Ben, H. Ren, S. Ma, D. Cao, J. Lan, X. Jing, W. Wang, J. Xu, F. Deng, J. M. Simmons, S. Qiu, and G. Zhu, *Angew. Chem. Int. Ed.*, 2009, **48**, 9457.
